# Supplementary material
Source: PubMed Central journal article supplement (PMC4734930)
Supplement: NIHMS753875-supplement-10549_2016_3687_MOESM1_ESM.pdf [file NIHMS753875-supplement-10549_2016_3687_MOESM1_ESM.pdf]

## **Supplemental Tables**

### **Incidental Radiologic Findings at Breast Cancer Diagnosis and Likelihood of Disease Recurrence**

*Breast Cancer Research and Treatment*

Joel M Brothers, MD, Kelley M Kidwell, PhD, Richard KJ Brown, MD, and N Lynn Henry, MD, PhD

**Corresponding Author:**

N. Lynn Henry, MD, PhD

University of Michigan Comprehensive Cancer Center

[norahh@med.umich.edu](mailto:norahh@med.umich.edu)

**Online Resource 1. Table of additional patient and clinical characteristics.**

| <b>Characteristic (n=340)</b>                | <b>No. (%)</b> |
|----------------------------------------------|----------------|
| Stage                                        |                |
| All Stage II                                 | 244 (71.8)     |
| Clinical II                                  | 50 (14.7)      |
| IIA                                          | 140 (41.2)     |
| IIB                                          | 54 (15.9)      |
| All Stage III                                | 96 (28.2)      |
| Clinical III                                 | 39 (11.5)      |
| IIIA                                         | 39 (11.5)      |
| IIIB                                         | 2 (0.6)        |
| IIIC                                         | 16 (4.7)       |
| Histopathology                               |                |
| Ductal                                       | 241 (70.9)     |
| Lobular                                      | 48 (14.1)      |
| Mixed                                        | 22 (6.5)       |
| Other                                        | 29 (12.1)      |
| Neoadjuvant Chemotherapy                     | 76 (22.4)      |
| Neoadjuvant Endocrine Therapy                | 6 (1.8)        |
| <b>Treatment summary (n=321)<sup>a</sup></b> |                |
| Chemotherapy                                 |                |
| Received                                     | 264 (82.2)     |
| Declined                                     | 24 (7.5)       |
| Not recommended                              | 25 (7.8)       |
| Unknown                                      | 8 (2.5)        |
| Endocrine Therapy                            |                |
| Received                                     | 203 (63.2)     |
| Declined                                     | 15 (4.7)       |
| Not a candidate                              | 85 (26.5)      |
| Unknown                                      | 18 (5.6)       |
| Herceptin                                    |                |
| Received                                     | 58 (18.1)      |
| Declined                                     | 3 (0.9)        |
| Not recommended                              | 256 (79.8)     |
| Unknown                                      | 4 (1.2)        |
| Radiation                                    |                |
| Received                                     | 233 (72.6)     |
| Declined                                     | 15 (4.7)       |
| Not recommended                              | 60 (18.7)      |
| Unknown                                      | 13 (4.0)       |

ER, estrogen receptor. PR, progesterone receptor.

<sup>a</sup> Treatment not recorded for 19 patients with metastatic disease at diagnosis.

**Online Resource 2. Table of specific types of incidental findings.**

| <b>CT Chest Incidental Findings (N=152)</b>          | <b>No. (%)</b> | <b>Determined to Represent Metastatic Disease, No. (%)</b> |
|------------------------------------------------------|----------------|------------------------------------------------------------|
| Calcified Lung Nodules <sup>a</sup>                  | 16 (10.5)      | -                                                          |
| Single Lung Nodule <5mm                              | 23 (15.1)      | -                                                          |
| Single Lung Nodule >5mm                              | 3 (2.0)        | -                                                          |
| Multiple Nodules <5mm                                | 32 (21.1)      | 2 (6.3)                                                    |
| Multiple Nodules >5mm                                | 15 (9.9)       | 8 (53.3)                                                   |
| Pleural Thickening                                   | 6 (3.9)        | -                                                          |
| Pleural Effusion                                     | 3 (2.0)        | 2 (66.7)                                                   |
| Borderline Lymph Nodes                               | 11 (7.2)       | 1 (9.1)                                                    |
| Enlarged Lymph Nodes                                 | 8 (5.3)        | 6 (75.0)                                                   |
| Sclerotic Bone Lesion                                | 10 (6.6)       | 3 (30.0)                                                   |
| Lytic Bone Lesion                                    | 8 (5.3)        | 8 (100)                                                    |
| Thyroid Abnormality                                  | 6 (4.0)        | -                                                          |
| Other                                                | 5 (3.3)        | -                                                          |
| <b>CT Abdomen/Pelvis Incidental Findings (N=153)</b> |                |                                                            |
| Liver Lesions <1cm                                   | 33 (21.6)      | -                                                          |
| Liver Lesions >1cm                                   | 24 (15.7)      | 6 (25.0)                                                   |
| Borderline Lymph Nodes                               | 9 (5.9)        | -                                                          |
| Enlarged Lymph Nodes                                 | 2 (1.3)        | -                                                          |
| Adrenal Nodules                                      | 10 (6.5)       | -                                                          |
| Renal Lesions                                        | 26 (17.0)      | -                                                          |
| Simple Renal Cyst <sup>a</sup>                       | 4 (2.6)        | -                                                          |
| Splenic Lesions                                      | 5 (3.3)        | 1 (20.0)                                                   |
| Adnexal Lesion                                       | 25 (16.3)      | 1 (4.0)                                                    |
| Sclerotic Bone Lesion                                | 16 (10.5)      | 3 (18.8)                                                   |
| Lytic Bone Lesion                                    | 6 (3.9)        | 6 (100)                                                    |
| Other                                                | 23 (15.0)      | -                                                          |
| <b>Bone Scan Incidental Findings (N=140)</b>         |                |                                                            |
| Degenerative Changes <sup>a</sup>                    | 96 (68.6)      | -                                                          |
| Abnormal Uptake Single Site                          | 24 (17.1)      | 3 (12.5)                                                   |
| Abnormal Uptake Multiple Sites                       | 15 (10.7)      | 6 (40.0)                                                   |
| Other                                                | 4 (2.3)        | -                                                          |
| <b>Sites of Abnormal Uptake on Bone Scan</b>         |                |                                                            |
| Skull/Head                                           | 9 (6.4)        | -                                                          |
| Spine                                                | 8 (5.7)        | 1 (12.5)                                                   |
| Ribs/Sternum                                         | 9 (6.4)        | 1 (11.1)                                                   |
| Shoulder/Humerus                                     | 2 (1.4)        | -                                                          |
| Pelvis/Hip/Femur                                     | 10 (7.1)       | 3 (30.0)                                                   |
| Knee                                                 | 1 (0.7)        | -                                                          |
| Ankle/Heel                                           | 2 (1.4)        | -                                                          |

| <b>Sites of Abnormal Uptake on Bone Scan</b>       | <b>No. (%)</b> | <b>Determined to Represent Metastatic Disease, No. (%)</b> |
|----------------------------------------------------|----------------|------------------------------------------------------------|
| Widespread                                         | 4 (2.9)        | 4 (100)                                                    |
| Unspecified                                        | 2 (1.4)        | -                                                          |
| <b>PET-CT Sites of Abnormal FDG-Avidity (N=15)</b> |                |                                                            |
| Suprasternal                                       | 1 (6.7)        | -                                                          |
| Adnexa                                             | 3 (20.0)       | -                                                          |
| Liver                                              | 4 (26.7)       | 2 (50.0)                                                   |
| Portocaval Lymph Nodes                             | 1 (6.7)        | 1 (100)                                                    |
| Spine                                              | 1 (6.7)        | 1 (100)                                                    |
| Thyroid                                            | 2 (13.3)       | -                                                          |
| Pulmonary Nodules                                  | 1 (6.7)        | 1 (100)                                                    |
| Colon/Rectum                                       | 1 (6.7)        | -                                                          |
| Iliac Crest                                        | 1 (6.7)        | 1 (100)                                                    |
| Mediastinal Lymph Nodes                            | 4 (26.7)       | 2 (50.0)                                                   |

Percentages do not total 100%. More than one type of incidental finding can be present on each imaging study, and incidental findings were not present on all scans. Findings related to the primary breast mass or axillary lymph nodes were not recorded.

<sup>a</sup> Findings interpreted as calcified lung nodules, simple renal cysts, and degenerative changes were considered to be benign and were categorized as normal for the purposes of this study. Findings interpreted as dental disease were not recorded.

**Online Resource 3. Table of follow-up imaging and procedures for incidental findings.**

| <b>Imaging Modality</b>            | <b>No.</b> |
|------------------------------------|------------|
| CT Chest                           | 68         |
| CT Abdomen/Pelvis                  | 37         |
| CT Head                            | 1          |
| PET-CT                             | 9          |
| US Abdomen or Retroperitoneum      | 14         |
| Any X-Ray study                    | 11         |
| MR Abdomen                         | 7          |
| MR Spine                           | 2          |
| MR Pelvis                          | 2          |
| MR Extremity                       | 1          |
| MR Brain                           | 1          |
| <b>Procedure</b>                   |            |
| CT Guided Bone Biopsy              | 5          |
| US Guided Liver Biopsy             | 4          |
| CT Guided Lung Biopsy              | 1          |
| Parotid Biopsy                     | 1          |
| Laparoscopic Salpingo-oophorectomy | 1          |

CT, computed tomography. MR, magnetic resonance. PET, positron emission tomography. US, ultrasound.
